# Supplementary material
Source: PubMed Central journal article supplement (PMC4833833)
Supplement: mmc1.pdf [file mmc1.pdf]

**Biophysical Journal, Volume 110**

**Supplemental Information**

**Emergent Global Contractile Force in Cardiac Tissues**

**Meghan B. Knight, Nancy K. Drew, Linda A. McCarthy, and Anna Grosberg**

**Biophysical Journal**

**Supporting Material**

**Emergent Global Contractile Force in Cardiac Tissues**

Meghan B. Knight,<sup>1,3</sup> Nancy K. Drew,<sup>1,3,4</sup> Linda A. McCarthy,<sup>1,3</sup> and Anna Grosberg<sup>1,2,3,4,\*</sup>

<sup>1</sup>Department of Biomedical Engineering, <sup>2</sup>Department of Chemical and Biochemical Engineering and Materials Science, <sup>3</sup>Center for Complex Biological Systems, and <sup>4</sup>The Edwards Lifesciences Center for Advanced Cardiovascular Technology, University of California-Irvine, Irvine, California

\*Correspondence: [grosberg@uci.edu](mailto:grosberg@uci.edu)

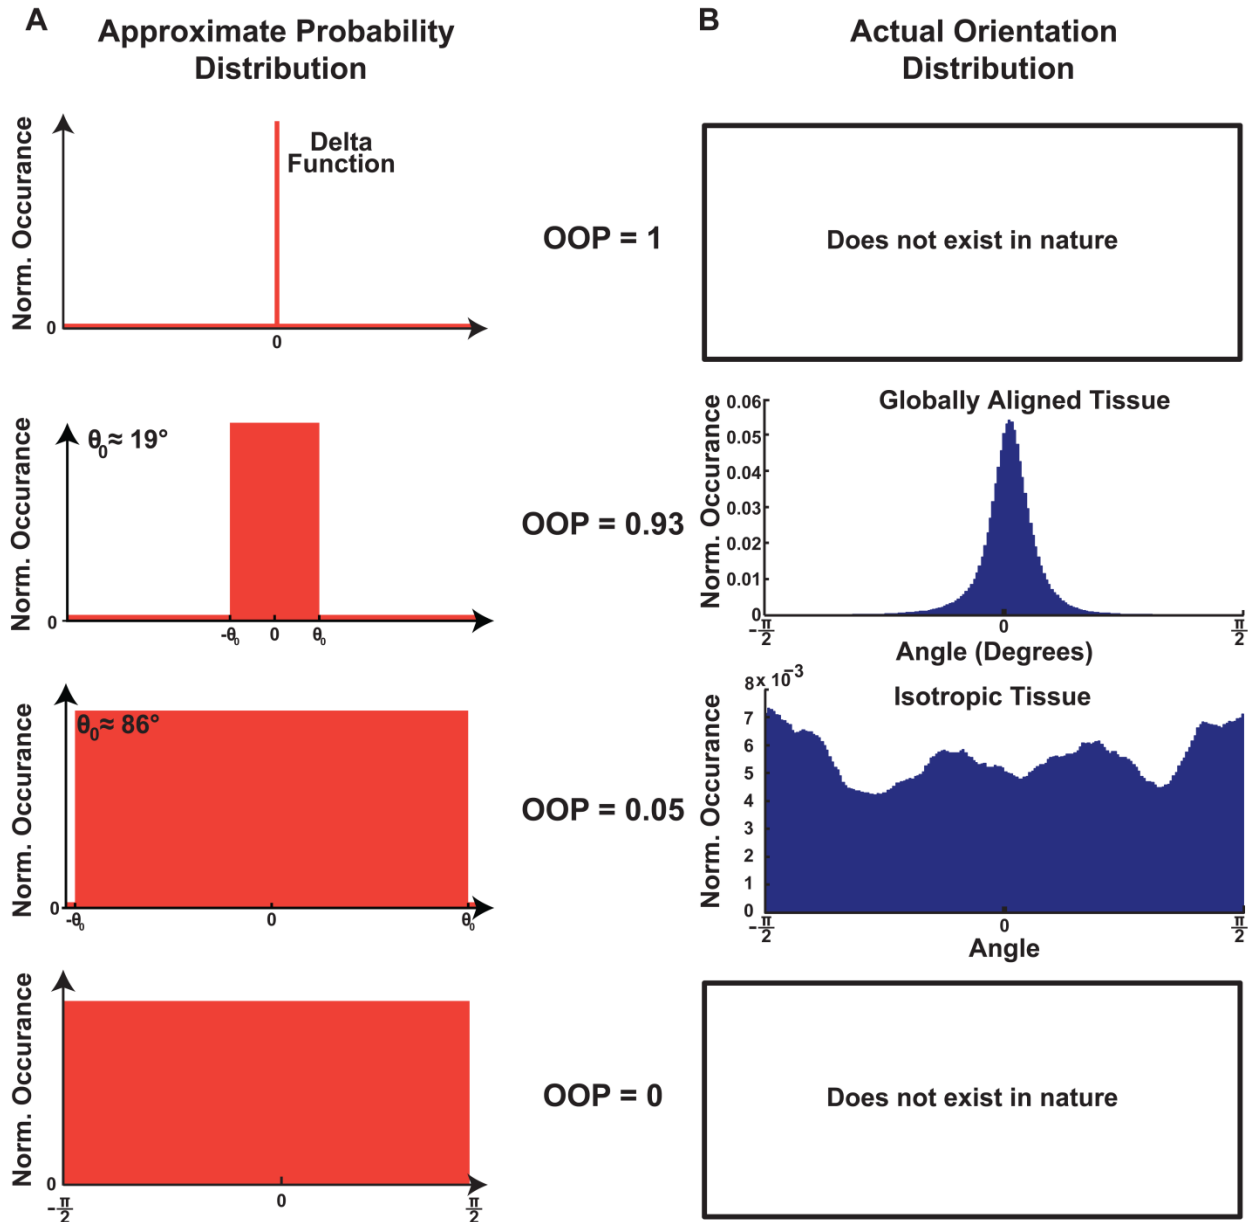

**Fig. S1: Approximate probability distribution vs. actual orientation distribution.** (A) Analytical representation of the approximate probability distribution of various conditions. An OOP of 1 has a delta function probability distribution. The spread of the probability distribution increases with decreasing OOP until an OOP of 0, at which point the probability is equal for all point on the interval  $[-\frac{\pi}{2}, \frac{\pi}{2}]$ . (B) In nature, the constructs do not reach an OOP of 1 or 0, but rather some in between OOP. A well-organized globally aligned anisotropic tissue can achieve an OOP close to 1 and a disorganized isotropic tissue can reach an OOP value close to 0.

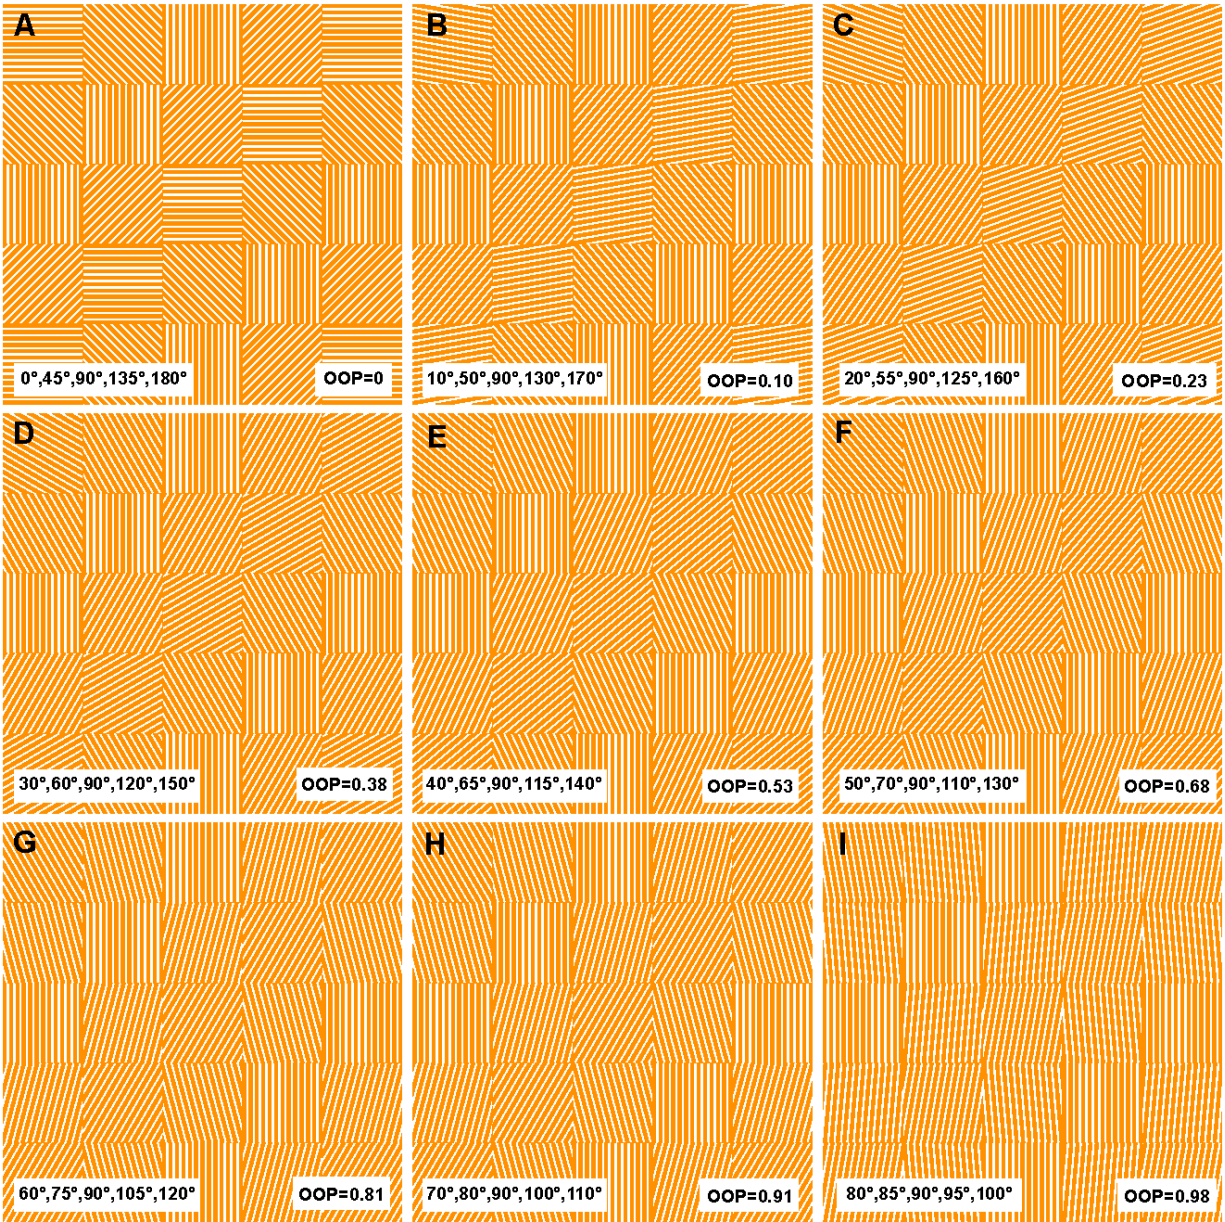

**Fig. S2: Parquet patterns.** Sample schematic of parquet variations from least organized to most organized (A-I).

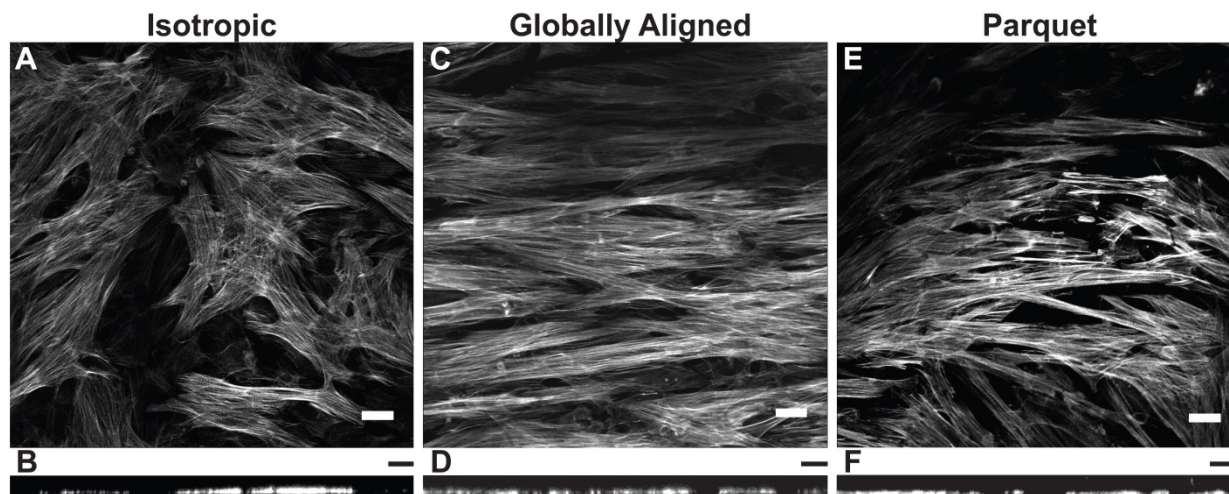

**Fig. S3: Confocal images of cell thickness.** (A,C,E) Z-stacks were obtained for isotropic (N=4), globally aligned (N=4), and parquet (N=3) samples. (B,D,F) Orthogonal views were used to determine cell thickness (Table S6). Scale bars: 25  $\mu\text{m}$  all panels.

**Table S1:** List of Local and Global OOP data and statistics for each tissue represented in Fig. 2K. Overall significance level is set to 0.050. (Values are Mean $\pm$ Standard Deviation).

| <b>Tissue Type</b>                                    | <b>Actin Local OOP</b>            | <b>Actin Global OOP</b>           | <b>Sample Size</b>  |
|-------------------------------------------------------|-----------------------------------|-----------------------------------|---------------------|
| <b>Globally aligned</b>                               | <b>0.92 <math>\pm</math> 0.01</b> | <b>0.92 <math>\pm</math> 0.01</b> | <b>3</b>            |
| <b>Parquet Images<br/>Excluding Borders</b>           | <b>0.88 <math>\pm</math> 0.01</b> | <b>0.04 <math>\pm</math> 0.03</b> | <b>3</b>            |
| <b>Parquet Images<br/>Including Borders</b>           | <b>0.81 <math>\pm</math> 0.05</b> | <b>0.11 <math>\pm</math> 0.09</b> | <b>3</b>            |
| <b>Isotropic</b>                                      | <b>0.45 <math>\pm</math> 0.04</b> | <b>0.07 <math>\pm</math> 0.03</b> | <b>3</b>            |
| <b>Comparison of Global<br/>OOP</b>                   | <b>Unadjusted p-value</b>         | <b>Critical Level</b>             | <b>Significant?</b> |
| <b>Globally aligned vs.<br/>Parquet w/o borders</b>   | <b>&lt;0.001</b>                  | <b>0.009</b>                      | <b>Yes</b>          |
| <b>Globally aligned vs.<br/>Isotropic</b>             | <b>&lt;0.001</b>                  | <b>0.010</b>                      | <b>Yes</b>          |
| <b>Globally aligned vs.<br/>Parquet w/ borders</b>    | <b>&lt;0.001</b>                  | <b>0.013</b>                      | <b>Yes</b>          |
| <b>Parquet w/o borders vs.<br/>Parquet w/ borders</b> | <b>0.119</b>                      | <b>0.017</b>                      | <b>No</b>           |
| <b>Parquet w/o borders vs.<br/>Isotropic</b>          | <b>0.405</b>                      | <b>0.025</b>                      | <b>No</b>           |
| <b>Parquet w/ borders vs.<br/>Isotropic</b>           | <b>0.411</b>                      | <b>0.050</b>                      | <b>No</b>           |
| <b>Comparison of Local<br/>OOP</b>                    | <b>Unadjusted p-value</b>         | <b>Critical Level</b>             | <b>Significant?</b> |
| <b>Globally aligned vs.<br/>Isotropic</b>             | <b>&lt;0.001</b>                  | <b>0.009</b>                      | <b>Yes</b>          |
| <b>Parquet w/o borders vs.<br/>Isotropic</b>          | <b>&lt;0.001</b>                  | <b>0.010</b>                      | <b>Yes</b>          |
| <b>Parquet w/ borders vs.<br/>Isotropic</b>           | <b>&lt;0.001</b>                  | <b>0.013</b>                      | <b>Yes</b>          |
| <b>Globally aligned vs.<br/>Parquet w/o borders</b>   | <b>0.002</b>                      | <b>0.017</b>                      | <b>Yes</b>          |
| <b>Parquet w/o borders vs.<br/>Parquet w/ borders</b> | <b>0.008</b>                      | <b>0.025</b>                      | <b>Yes</b>          |
| <b>Globally aligned vs.<br/>Parquet w/ borders</b>    | <b>0.299</b>                      | <b>0.050</b>                      | <b>No</b>           |

**Table S2:** List of genes tested in Rat Cardiovascular Disease Array. Genes in red were significantly different between isotropic and globally aligned tissues. P-values in blue indicate genes for which the expression was undetected and thus the fold-change result was erroneous or un-interpretable as determined by the online software.

| Gene Symbol   | Description                                                 | Function                            | p-value (compared to globally aligned) | p-value (compared to isotropic) |                  |
|---------------|-------------------------------------------------------------|-------------------------------------|----------------------------------------|---------------------------------|------------------|
|               |                                                             |                                     | Parquet                                | Parquet                         | Globally aligned |
| <b>Pde7a</b>  | <b>Phosphodiesterase 7A</b>                                 | <b>Signal Transduction</b>          | <b>0.024</b>                           | <b>0.034</b>                    | <b>0.011</b>     |
| <b>Ubb</b>    | <b>Ubiquitin B</b>                                          | <b>Apoptosis</b>                    | <b>0.485</b>                           | <b>0.011</b>                    | <b>0.015</b>     |
| <b>Hmgcl</b>  | <b>3-hydroxymethyl-3-methylglutaryl-Coenzyme A lyase</b>    | <b>Signal Transduction</b>          | <b>0.287</b>                           | <b>0.032</b>                    | <b>0.047</b>     |
| <b>Crem</b>   | <b>CAMP responsive element modulator</b>                    | <b>Transcriptional Regulation</b>   | <b>0.283</b>                           | <b>0.045</b>                    | <b>0.002</b>     |
| <b>Zyx</b>    | <b>Zyxin</b>                                                | <b>Apoptosis</b>                    | <b>0.192</b>                           | <b>0.054</b>                    | <b>0.042</b>     |
| <b>Nr3c2</b>  | <b>Nuclear receptor subfamily 3, group C, member 2</b>      | <b>Signal Transduction</b>          | <b>0.969</b>                           | <b>0.064</b>                    | <b>0.031</b>     |
| <b>Rassf1</b> | <b>Ras association (RalGDS/AF-6) domain family member 1</b> | <b>Signal Transduction</b>          | <b>0.785</b>                           | <b>0.067</b>                    | <b>0.046</b>     |
| <b>Cdkn1b</b> | <b>Cyclin-dependent kinase inhibitor 1B</b>                 | <b>Cell Cycle</b>                   | <b>0.974</b>                           | <b>0.074</b>                    | <b>0.050</b>     |
| <b>Adrb1</b>  | <b>Adrenergic, beta-1-, receptor</b>                        | <b>Signal Transduction</b>          | <b>0.631</b>                           | <b>0.086</b>                    | <b>0.050</b>     |
| <b>Ren</b>    | <b>Renin</b>                                                | <b>Cardiac Remodeling</b>           | <b>0.697</b>                           | <b>0.097</b>                    | <b>0.015</b>     |
| <b>Stat1</b>  | <b>Signal transducer and activator of transcription 1</b>   | <b>Transcriptional Regulation</b>   | <b>0.854</b>                           | <b>0.118</b>                    | <b>0.019</b>     |
| <b>S100a1</b> | <b>S100 calcium binding protein A1</b>                      | <b>Stress &amp; Immune Response</b> | <b>0.487</b>                           | <b>0.275</b>                    | <b>0.049</b>     |
| <b>Klhl3</b>  | <b>Kelch-like family member 3</b>                           | <b>Transcriptional Regulation</b>   | <b>0.109</b>                           | <b>0.479</b>                    | <b>0.015</b>     |

| Gene Symbol | Description                                                                                          | Function                      | p-value<br>(compared<br>to globally<br>aligned) | p-value (compared<br>to isotropic) |                     |
|-------------|------------------------------------------------------------------------------------------------------|-------------------------------|-------------------------------------------------|------------------------------------|---------------------|
|             |                                                                                                      |                               | Parquet                                         | Parquet                            | Globally<br>aligned |
| Actc1       | Actin, alpha, cardiac muscle 1                                                                       | Sarcomere Structural Proteins | 0.887                                           | 0.068                              | 0.241               |
| Adra1a      | Adrenergic, alpha-1A-, receptor                                                                      | Signal Transduction           | 0.214                                           | 0.262                              | 0.173               |
| Adra1b      | Adrenergic, alpha-1B-, receptor                                                                      | Signal Transduction           | 0.908                                           | 0.568                              | 0.514               |
| Adra1b      | Adrenergic, alpha-1B-, receptor                                                                      | Signal Transduction           | 0.908                                           | 0.568                              | 0.514               |
| Adra1d      | Adrenergic, alpha-1D-, receptor                                                                      | Signal Transduction           | 0.837                                           | 0.193                              | 0.075               |
| Adrb2       | Adrenergic, beta-2-, receptor,surface                                                                | Signal Transduction           | 0.754                                           | 0.689                              | 0.230               |
| Adrb3       | Adrenergic, beta-3-, receptor                                                                        | Signal Transduction           | 0.542                                           | 0.542                              | 0.217               |
| Aebp1       | AE binding protein 1                                                                                 | Cardiac Remodeling            | 0.855                                           | 0.945                              | 0.860               |
| Agtr1a      | Angiotensin II receptor, type 1a                                                                     | Signal Transduction           | 0.389                                           | 0.270                              | 0.081               |
| Anxa4       | Annexin A4                                                                                           | Cardiac Remodeling            | 0.490                                           | 0.339                              | 0.177               |
| Ar          | Androgen receptor                                                                                    | Signal Transduction           | 0.995                                           | 0.193                              | 0.170               |
| Atp2a2      | ATPase, Ca <sup>++</sup> transporting, cardiac muscle, slow twitch 2                                 | Transporters                  | 0.780                                           | 0.096                              | 0.086               |
| Atp5a1      | ATP synthase, H <sup>+</sup> transporting, mitochondrial F1 complex, alpha subunit 1, cardiac muscle | Transporters                  | 0.396                                           | 0.412                              | 0.934               |
| C6          | Complement component 6                                                                               | Stress & Immune Response      | 0.475                                           | 0.504                              | 0.852               |
| Ccl11       | Chemokine (C-C motif) ligand 11                                                                      | Stress & Immune Response      | 0.235                                           | 0.233                              | 0.184               |



| Gene Symbol | Description                                                              | Function                            | p-value<br>(compared<br>to globally<br>aligned) | p-value (compared<br>to isotropic) |                     |
|-------------|--------------------------------------------------------------------------|-------------------------------------|-------------------------------------------------|------------------------------------|---------------------|
|             |                                                                          |                                     | Parquet                                         | Parquet                            | Globally<br>aligned |
| Ccl2        | Chemokine (C-C motif)<br>ligand 2                                        | Stress &<br>Immune<br>Response      | 0.892                                           | 0.870                              | 0.787               |
| Ccnd1       | Cyclin D1                                                                | Cell Cycle                          | 0.214                                           | 0.262                              | 0.173               |
| Col11a1     | Collagen, type XI, alpha 1                                               | Cardiac<br>Remodeling               | 0.908                                           | 0.568                              | 0.514               |
| Col1a1      | Collagen, type I, alpha 1                                                | Cardiac<br>Remodeling               | 0.424                                           | 0.664                              | 0.294               |
| Col3a1      | Collagen, type III, alpha 1                                              | Cardiac<br>Remodeling               | 0.838                                           | 0.619                              | 0.640               |
| Creb5       | CAMP responsive element<br>binding protein 5                             | Transcriptional<br>Regulation       | 0.068                                           | 0.200                              | 0.132               |
| Cryab       | Crystallin, alpha B                                                      | Sarcomere<br>Structural<br>Proteins | 0.487                                           | 0.450                              | 0.118               |
| Crym        | Crystallin, mu                                                           | Sarcomere<br>Structural<br>Proteins | 0.581                                           | 0.275                              | 0.249               |
| Ctgf        | Connective tissue growth<br>factor                                       | Cell Growth                         | 0.735                                           | 0.197                              | 0.214               |
| Cxcl12      | Chemokine (C-X-C motif)<br>ligand 12 (stromal cell-<br>derived factor 1) | Stress &<br>Immune<br>Response      | 0.864                                           | 0.312                              | 0.270               |
| Dcn         | Decorin                                                                  | Cardiac<br>Remodeling               | 0.829                                           | 0.488                              | 0.373               |
| Dmd         | Dystrophin                                                               | Cardiac<br>Remodeling               | 0.943                                           | 0.378                              | 0.195               |
| Dusp6       | Dual specificity<br>phosphatase 6                                        | Signal<br>Transduction              | 0.933                                           | 0.900                              | 0.949               |
| Enah        | Enabled homolog<br>(Drosophila)                                          | Transcriptional<br>Regulation       | 0.454                                           | 0.124                              | 0.185               |
| Epor        | Erythropoietin receptor                                                  | Signal<br>Transduction              | 0.481                                           | 0.734                              | 0.668               |

| Gene Symbol   | Description                                                 | Function                             | p-value<br>(compared<br>to globally<br>aligned) | p-value (compared<br>to isotropic) |                     |
|---------------|-------------------------------------------------------------|--------------------------------------|-------------------------------------------------|------------------------------------|---------------------|
|               |                                                             |                                      | Parquet                                         | Parquet                            | Globally<br>aligned |
| <b>F2r</b>    | <b>Coagulation factor II (thrombin) receptor</b>            | <b>Cardiac Remodeling</b>            | <b>0.256</b>                                    | <b>0.607</b>                       | <b>0.182</b>        |
| <b>Fn1</b>    | <b>Fibronectin 1</b>                                        | <b>Cardiac Remodeling</b>            | <b>0.878</b>                                    | <b>0.089</b>                       | <b>0.051</b>        |
| <b>Frzb</b>   | <b>Frizzled-related protein</b>                             | <b>Signal Transduction</b>           | <b>0.732</b>                                    | <b>0.464</b>                       | <b>0.717</b>        |
| <b>G0s2</b>   | <b>G0/G1 switch 2</b>                                       | <b>Cell Cycle</b>                    | <b>0.739</b>                                    | <b>0.652</b>                       | <b>0.976</b>        |
| <b>Gja1</b>   | <b>Gap junction protein, alpha 1</b>                        | <b>Cardiac Remodeling</b>            | <b>0.385</b>                                    | <b>0.126</b>                       | <b>0.750</b>        |
| <b>Hmgcr</b>  | <b>3-hydroxy-3-methylglutaryl-Coenzyme A reductase</b>      | <b>Signal Transduction</b>           | <b>0.890</b>                                    | <b>0.053</b>                       | <b>0.064</b>        |
| <b>Hmgn2</b>  | <b>High mobility group nucleosomal binding domain 2</b>     | <b>Transcriptional Regulation</b>    | <b>0.149</b>                                    | <b>0.796</b>                       | <b>0.242</b>        |
| <b>Maoa</b>   | <b>Monoamine oxidase A</b>                                  | <b>Apoptosis</b>                     | <b>0.412</b>                                    | <b>0.257</b>                       | <b>0.591</b>        |
| <b>Mapk1</b>  | <b>Mitogen activated protein kinase 1</b>                   | <b>Signal Transduction</b>           | <b>0.746</b>                                    | <b>0.133</b>                       | <b>0.099</b>        |
| <b>Mapk8</b>  | <b>Mitogen activated protein kinase 8</b>                   | <b>Signal Transduction</b>           | <b>0.866</b>                                    | <b>0.509</b>                       | <b>0.429</b>        |
| <b>Msi2</b>   | <b>Musashi RNA-binding protein 2</b>                        | <b>Transcriptional Regulation</b>    | <b>0.775</b>                                    | <b>0.067</b>                       | <b>0.202</b>        |
| <b>Myh10</b>  | <b>Myosin, heavy chain 10, non-muscle</b>                   | <b>Sarcomere Structural Proteins</b> | <b>0.671</b>                                    | <b>0.357</b>                       | <b>0.243</b>        |
| <b>Myh6</b>   | <b>Myosin, heavy chain 6, cardiac muscle, alpha</b>         | <b>Sarcomere Structural Proteins</b> | <b>0.593</b>                                    | <b>0.641</b>                       | <b>0.975</b>        |
| <b>Ndufb5</b> | <b>NADH dehydrogenase (ubiquinone) 1 beta subcomplex, 5</b> | <b>Apoptosis</b>                     | <b>0.894</b>                                    | <b>0.205</b>                       | <b>0.274</b>        |
| <b>Neb1</b>   | <b>Nebulette</b>                                            | <b>Sarcomere Structural Proteins</b> | <b>0.917</b>                                    | <b>0.263</b>                       | <b>0.352</b>        |
| <b>Nfia</b>   | <b>Nuclear factor I/A</b>                                   | <b>Transcriptional Regulation</b>    | <b>0.667</b>                                    | <b>0.627</b>                       | <b>0.453</b>        |

| Gene Symbol    | Description                                                                                     | Function                             | p-value<br>(compared<br>to globally<br>aligned) | p-value (compared<br>to isotropic) |                     |
|----------------|-------------------------------------------------------------------------------------------------|--------------------------------------|-------------------------------------------------|------------------------------------|---------------------|
|                |                                                                                                 |                                      | Parquet                                         | Parquet                            | Globally<br>aligned |
| <b>Nkx2-5</b>  | <b>NK2 transcription factor related, locus 5 (dDrosophila)</b>                                  | <b>Transcriptional Regulation</b>    | <b>0.115</b>                                    | <b>0.092</b>                       | <b>0.069</b>        |
| <b>Nppa</b>    | <b>Natriuretic peptide precursor A</b>                                                          | <b>Apoptosis</b>                     | <b>0.222</b>                                    | <b>0.136</b>                       | <b>0.126</b>        |
| <b>Nppb</b>    | <b>Natriuretic peptide precursor B</b>                                                          | <b>Apoptosis</b>                     | <b>0.347</b>                                    | <b>0.307</b>                       | <b>0.260</b>        |
| <b>Npr1</b>    | <b>Natriuretic peptide receptor A/guanylate cyclase A (atrionatriuretic peptide receptor A)</b> | <b>Apoptosis</b>                     | <b>0.958</b>                                    | <b>0.321</b>                       | <b>0.123</b>        |
| <b>Npr2</b>    | <b>Natriuretic peptide receptor B/guanylate cyclase (atrionatriuretic peptide receptor B)</b>   | <b>Signal Transduction</b>           | <b>0.643</b>                                    | <b>0.187</b>                       | <b>0.051</b>        |
| <b>Npr3</b>    | <b>Natriuretic peptide receptor A/guanylate cyclase C (atrionatriuretic peptide receptor C)</b> | <b>Signal Transduction</b>           | <b>0.879</b>                                    | <b>0.799</b>                       | <b>0.652</b>        |
| <b>Nr3c1</b>   | <b>Nuclear receptor subfamily 3, group C, member 1</b>                                          | <b>Signal Transduction</b>           | <b>0.655</b>                                    | <b>0.071</b>                       | <b>0.161</b>        |
| <b>Pde3a</b>   | <b>Phosphodiesterase 3A, cGMP inhibited</b>                                                     | <b>Apoptosis</b>                     | <b>0.964</b>                                    | <b>0.166</b>                       | <b>0.199</b>        |
| <b>Pde3b</b>   | <b>Phosphodiesterase 3B, cGMP inhibited</b>                                                     | <b>Signal Transduction</b>           | <b>0.642</b>                                    | <b>0.119</b>                       | <b>0.211</b>        |
| <b>Pde5a</b>   | <b>Phosphodiesterase 5A, cGMP inhibited</b>                                                     | <b>Signal Transduction</b>           | <b>0.625</b>                                    | <b>0.237</b>                       | <b>0.481</b>        |
| <b>Postn</b>   | <b>Periostin, osteoblast specific factor</b>                                                    | <b>Sarcomere Structural Proteins</b> | <b>0.239</b>                                    | <b>0.897</b>                       | <b>0.328</b>        |
| <b>Ptn</b>     | <b>Pleiotrophin</b>                                                                             | <b>Cell Growth</b>                   | <b>0.820</b>                                    | <b>0.846</b>                       | <b>0.939</b>        |
| <b>Rarres1</b> | <b>Retinoic acid receptor responder (tazarotene induced) 1</b>                                  | <b>Cell Cycle</b>                    | <b>0.807</b>                                    | <b>0.999</b>                       | <b>0.419</b>        |

| Gene Symbol | Description                                                                       | Function                       | p-value<br>(compared<br>to globally<br>aligned) | p-value (compared<br>to isotropic) |                     |
|-------------|-----------------------------------------------------------------------------------|--------------------------------|-------------------------------------------------|------------------------------------|---------------------|
|             |                                                                                   |                                | Parquet                                         | Parquet                            | Globally<br>aligned |
| Rtn4        | Reticulon 4                                                                       | Cardiac<br>Remodeling          | 0.436                                           | 0.060                              | 0.110               |
| S100a8      | S100 calcium binding<br>protein A8                                                | Stress &<br>Immune<br>Response | 0.794                                           | 0.718                              | 0.863               |
| Serpina3n   | Serin (or cysteine)<br>peptidase inhibitor, clase<br>A, member 3N                 | Cardiac<br>Remodeling          | 0.837                                           | 0.950                              | 0.756               |
| Sfrp4       | Secreted frizzled-related<br>protein 4                                            | Cell Growth                    | 0.445                                           | 0.731                              | 0.387               |
| Snca        | Synuclein, alpha (non A4<br>component of amyloid<br>precursor)                    | Apoptosis                      | 0.828                                           | 0.531                              | 0.534               |
| Spock1      | Sparc/osteonectin, cwcv<br>and kazal-like domains<br>proteoglycan (testican) 1    | Cell Growth                    | 0.768                                           | 0.954                              | 0.594               |
| Tcf4        | Transcription factor 4                                                            | Transcriptional<br>Regulation  | 0.698                                           | 0.137                              | 0.089               |
| Thbs2       | Thrombospondin 2                                                                  | Apoptosis                      | 0.964                                           | 0.917                              | 0.963               |
| Tnni3       | Troponin I type 3 (cardiac)                                                       | Cardiac<br>Remodeling          | 0.837                                           | 0.219                              | 0.125               |
| Tnnt2       | Troponin T type 2<br>(cardiac)                                                    | Cardiac<br>Remodeling          | 0.604                                           | 0.159                              | 0.144               |
| Ace         | Angiotensin I converting<br>enzyme (peptidyl-<br>dipeptidase A) 1                 | Cell Growth                    | 0.700                                           | 0.288                              | 0.015               |
| Mmp13       | Matrix metallopeptidase 13                                                        | Cardiac<br>Remodeling          | 0.700                                           | 0.288                              | 0.015               |
| Slc12a1     | Solute carrier family 12<br>(sodium/potassium/chloride<br>transporters), member 1 | Signal<br>Transduction         | 0.700                                           | 0.288                              | 0.015               |

**Table S3:** List of experimental data and statistics for all tissue types for each respective stress as represented in Fig. 3D. Overall significance level is set to 0.050. (Values are Mean±Standard Deviation).

| <b>Tissue Type</b>                    | <b>Systolic Stress (kPa)</b> | <b>Diastolic Stress (kPa)</b> | <b>Active Stress (kPa)</b> | <b>Sample Size</b> |
|---------------------------------------|------------------------------|-------------------------------|----------------------------|--------------------|
| <b>Globally aligned</b>               | <b>12.8 ± 4.87</b>           | <b>6.46 ± 1.78</b>            | <b>6.36 ± 4.63</b>         | <b>28</b>          |
| <b>Model</b>                          | <b>9.10 ± 3.46</b>           | <b>4.58 ± 1.26</b>            | <b>4.51 ± 3.29</b>         | <b>22</b>          |
| <b>Parquet</b>                        | <b>7.20 ± 2.99</b>           | <b>4.56 ± 1.04</b>            | <b>2.64 ± 2.63</b>         | <b>28</b>          |
| <b>Isotropic</b>                      | <b>4.53 ± 1.46</b>           | <b>2.56 ± 1.27</b>            | <b>0.91 ± 0.59</b>         | <b>27</b>          |
| <b>Comparison of Systolic Stress</b>  | <b>Unadjusted p-value</b>    | <b>Critical Level</b>         | <b>Significant?</b>        |                    |
| <b>Globally aligned vs. Isotropic</b> | <b>&lt;0.001</b>             | <b>0.009</b>                  | <b>Yes</b>                 |                    |
| <b>Globally aligned vs. Parquet</b>   | <b>&lt;0.001</b>             | <b>0.010</b>                  | <b>Yes</b>                 |                    |
| <b>Model vs. Isotropic</b>            | <b>&lt;0.001</b>             | <b>0.013</b>                  | <b>Yes</b>                 |                    |
| <b>Globally aligned vs. Model</b>     | <b>&lt;0.001</b>             | <b>0.017</b>                  | <b>Yes</b>                 |                    |
| <b>Parquet vs. Isotropic</b>          | <b>0.008</b>                 | <b>0.025</b>                  | <b>Yes</b>                 |                    |
| <b>Model vs. Parquet</b>              | <b>0.057</b>                 | <b>0.050</b>                  | <b>No</b>                  |                    |
| <b>Comparison of Diastolic Stress</b> | <b>Unadjusted p-value</b>    | <b>Critical Level</b>         | <b>Significant?</b>        |                    |
| <b>Globally aligned vs. Isotropic</b> | <b>&lt;0.001</b>             | <b>0.009</b>                  | <b>Yes</b>                 |                    |
| <b>Model vs. Isotropic</b>            | <b>&lt;0.001</b>             | <b>0.010</b>                  | <b>Yes</b>                 |                    |
| <b>Globally aligned vs. Model</b>     | <b>&lt;0.001</b>             | <b>0.013</b>                  | <b>Yes</b>                 |                    |
| <b>Parquet vs. Isotropic</b>          | <b>&lt;0.001</b>             | <b>0.017</b>                  | <b>Yes</b>                 |                    |
| <b>Globally aligned vs. Parquet</b>   | <b>&lt;0.001</b>             | <b>0.025</b>                  | <b>Yes</b>                 |                    |
| <b>Model vs. Parquet</b>              | <b>0.953</b>                 | <b>0.050</b>                  | <b>No</b>                  |                    |

Table S3 (cont'd):

| Comparison of Active Stress    | Unadjusted p-value | Critical Level | Significant? |
|--------------------------------|--------------------|----------------|--------------|
| Globally aligned vs. Isotropic | <0.001             | 0.009          | Yes          |
| Model vs. Isotropic            | <0.001             | 0.010          | Yes          |
| Globally aligned vs. Parquet   | <0.001             | 0.013          | Yes          |
| Globally aligned vs. Model     | 0.033              | 0.017          | No           |
| Model vs. Parquet              | 0.041              | 0.025          | No           |
| Parquet vs. Isotropic          | 0.061              | 0.050          | No           |

**Table S4:** List of experimental actin OOP values for each tissue type including number of samples. (Values are Mean $\pm$ Standard Deviation).

| Tissue Type                         | Pattern OOP | Actin Global OOP | No. of Chips |
|-------------------------------------|-------------|------------------|--------------|
| Isotropic                           | 0.00        | 0.09 $\pm$ 0.03  | 3            |
| Parquet (0,45,90,135,180)           | 0.00        | 0.05 $\pm$ 0.00  | 3            |
| Parquet (10,50,90,130,170)          | 0.10        | 0.12 $\pm$ 0.05  | 6            |
| Parquet (20,55,90,125,160)          | 0.23        | 0.19 $\pm$ 0.10  | 5            |
| Parquet (30,60,90,120,150)          | 0.38        | 0.27 $\pm$ 0.04  | 6            |
| Parquet (40,65,90,115,140)          | 0.53        | 0.43 $\pm$ 0.07  | 4            |
| Parquet (50,70,90,110,130)          | 0.68        | 0.55 $\pm$ 0.05  | 4            |
| Parquet (60,75,90,105,120)          | 0.81        | 0.66 $\pm$ 0.02  | 3            |
| Parquet (70,80,90,100,110)          | 0.91        | 0.72 $\pm$ 0.02  | 9            |
| Parquet (80,85,90,95,100)           | 0.98        | 0.83 $\pm$ 0.07  | 8            |
| Globally aligned = (90,90,90,90,90) | 1.00        | 0.92 $\pm$ 0.01  | 3            |

**Table S5:** List of experimental sample sizes for each tissue type including average measured systolic stress, number of samples, number of chips, and number of harvests across which each pattern was tested. Error represented as standard deviation.

| <b>Tissue Type</b>                         | <b>Average Systolic Stress (kPa)</b> | <b>No. of Samples</b> | <b>No. of Chips</b> | <b>Across No. of Harvests</b> |
|--------------------------------------------|--------------------------------------|-----------------------|---------------------|-------------------------------|
| <b>Isotropic</b>                           | <b><math>4.53 \pm 1.46</math></b>    | <b>27</b>             | <b>8</b>            | <b>3</b>                      |
| <b>Parquet (0,45,90,135,180)</b>           | <b><math>7.20 \pm 2.99</math></b>    | <b>22</b>             | <b>6</b>            | <b>2</b>                      |
| <b>Parquet (10,50,90,130,170)</b>          | <b><math>6.55 \pm 2.62</math></b>    | <b>26</b>             | <b>6</b>            | <b>4</b>                      |
| <b>Parquet (20,55,90,125,160)</b>          | <b><math>8.75 \pm 4.92</math></b>    | <b>19</b>             | <b>5</b>            | <b>3</b>                      |
| <b>Parquet (30,60,90,120,150)</b>          | <b><math>8.73 \pm 3.62</math></b>    | <b>30</b>             | <b>6</b>            | <b>5</b>                      |
| <b>Parquet (40,65,90,115,140)</b>          | <b><math>10.0 \pm 4.16</math></b>    | <b>20</b>             | <b>4</b>            | <b>3</b>                      |
| <b>Parquet (50,70,90,110,130)</b>          | <b><math>9.54 \pm 4.37</math></b>    | <b>22</b>             | <b>4</b>            | <b>3</b>                      |
| <b>Parquet (60,75,90,105,120)</b>          | <b><math>9.59 \pm 4.45</math></b>    | <b>24</b>             | <b>4</b>            | <b>3</b>                      |
| <b>Parquet (70,80,90,100,110)</b>          | <b><math>10.4 \pm 5.43</math></b>    | <b>56</b>             | <b>9</b>            | <b>3</b>                      |
| <b>Parquet (80,85,90,95,100)</b>           | <b><math>12.4 \pm 4.01</math></b>    | <b>50</b>             | <b>8</b>            | <b>3</b>                      |
| <b>Globally aligned = (90,90,90,90,90)</b> | <b><math>12.8 \pm 4.87</math></b>    | <b>28</b>             | <b>7</b>            | <b>3</b>                      |

**Table S6:** List of tissue thicknesses measured for each tissue type with corresponding samples sizes. Error represented as standard deviation.

| <b>Tissue Type</b>               | <b>Measured Cell Thickness (<math>\mu\text{m}</math>)</b> | <b>No. of Samples</b> |
|----------------------------------|-----------------------------------------------------------|-----------------------|
| <b>Globally aligned</b>          | <b><math>4.9 \pm 0.9</math></b>                           | <b>4</b>              |
| <b>Isotropic</b>                 | <b><math>6.6 \pm 1.4</math></b>                           | <b>4</b>              |
| <b>Parquet (0,45,90,135,180)</b> | <b><math>5.4 \pm 0.5</math></b>                           | <b>3</b>              |



**Video Captions**

**Video S1.** Analyzed video of isotropic muscular thin films during contractility experiments.

**Video S2.** Analyzed video of parquet patterned muscular thin films during contractility experiments.

**Video S3.** Analyzed video of globally aligned muscular thin films during contractility experiments.
